# Supplementary material
Source: PubMed Central journal article supplement (PMC7042928)
Supplement: jamapediatr-174-428-s001.pdf [file jamapediatr-174-428-s001.pdf]

## Supplementary Online Content

Delavar A, Barnes JM, Wang X, Johnson KJ. Association between race/ethnicity and US childhood and adolescent cancer survival by treatment amenability. *JAMA Pediatr*. Published online February 24, 2020. doi:10.1001/jamapediatrics.2019.6074

**eFigure 1.** Directed Acyclic Graph

**eFigure 2.** Flow Chart of Subject Exclusions

**eTable 1.** SEER Variables Used in the Analysis

**eTable 2.** Cancer Types Represented in the Analysis

**eTable 3.** Risk of Cancer Death for Children and Adolescents Diagnosed With Cancer From 2007-2016 by Race/Ethnicity and Cancer Amenability Category (Low: <70% RSR, Medium: 70-85% RSR, High: >85% RSR) With Non-Hispanic Whites as the Reference Group and Adjusting for Insurance Status

**eTable 4.** Risk of Cancer Death for Children and Adolescents Diagnosed With Cancer From 2000-2016 by Race/Ethnicity and Cancer Amenability Category ( $\leq 50\%$  and  $>50\%$  RSR) With Non-Hispanic White as the Reference Group and Adjusting for Insurance Status

**eTable 5.** Risk of Cancer Death for Children and Adolescents Diagnosed With Cancer From 2000-2016 by Race/Ethnicity for Common Cancer Types

### **eReferences**

This supplementary material has been provided by the authors to give readers additional information about their work.

**eFigure 1. Directed acyclic graph.**

Directed acyclic graph of known and suspected confounders for the relationship between race/ethnicity and cancer survival among children and adolescents. Age, sex, parent race/ethnicity, parent income, parent education, insurance status, cancer type, and stage at diagnosis were considered. Parent income and education provides a minimal set of covariates necessary for mitigating confounding bias for this relationship.

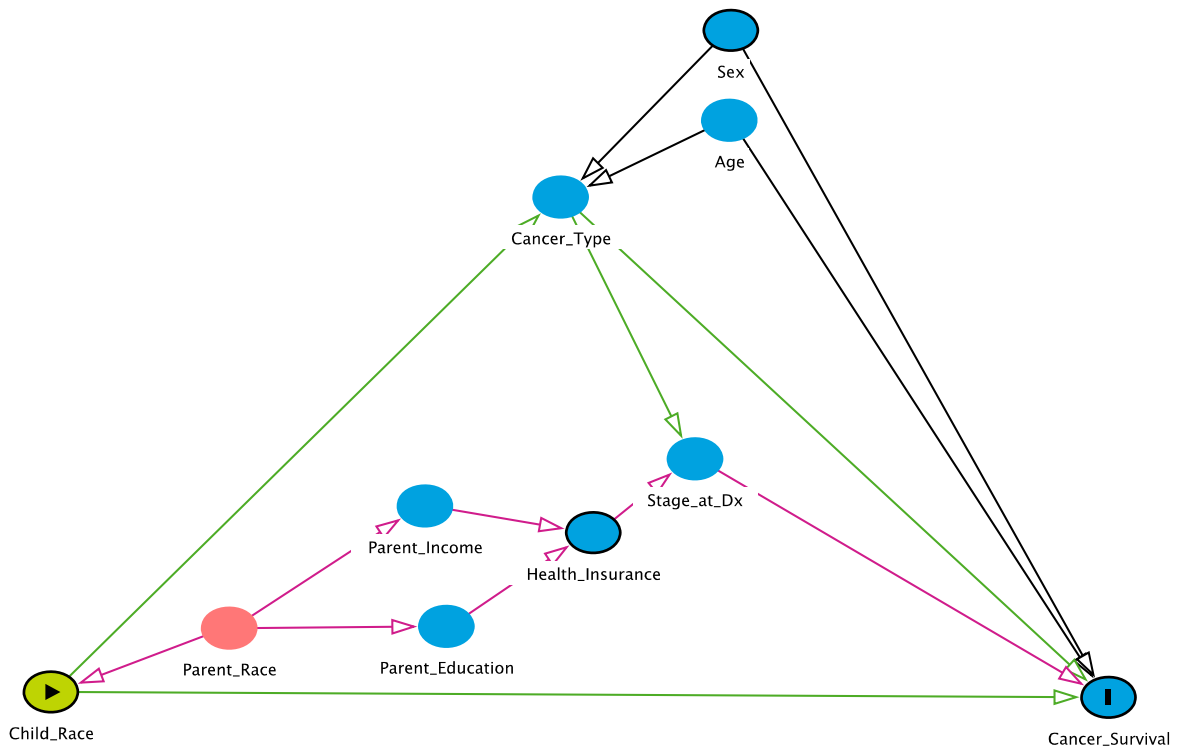

**eFigure 2.** Flow Chart of Subject Exclusions

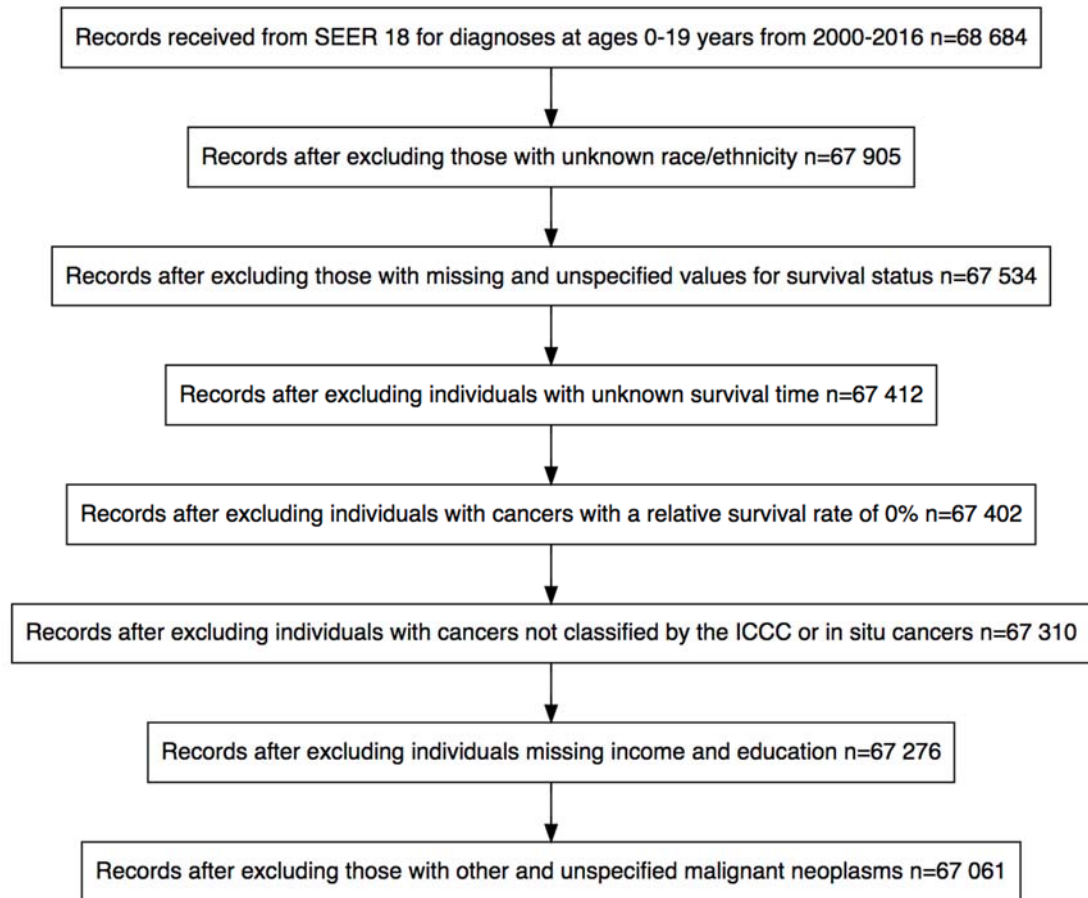

**eTable 1. SEER variables used in the analysis.**

| <b>SEER variable</b>                                                                      | <b>Variable description</b>                      |
|-------------------------------------------------------------------------------------------|--------------------------------------------------|
| Patient ID                                                                                | Patient identification                           |
| Age at diagnosis                                                                          | Age at cancer diagnosis                          |
| Year of diagnosis                                                                         | Year of cancer diagnosis                         |
| SEER cause-specific death classification                                                  | Death by cancer or alive/dead by other cause     |
| Survival months                                                                           | Survival months                                  |
| Sex                                                                                       | Sex                                              |
| Race and origin recode (NHW, NHB, NHAIAN, NHAPI, Hispanic)<br>Race and Hispanic ethnicity | Race and Hispanic ethnicity                      |
| ICCC site rec extended ICD-O-3/WHO 2008                                                   | International classification of childhood cancer |
| Median family income (in tens) 2000                                                       | Median family income in county                   |
| % High school education 2000                                                              | Percent with less than high school education     |
| Insurance Recode (2007+)                                                                  | Health insurance status                          |

**eTable 2. Cancer types represented in the analysis.**

| Cancer type <sup>a</sup>                                   | Count | RSR <sup>b</sup> | RSR 3-category <sup>c</sup> | RSR 2-category <sup>c</sup> |
|------------------------------------------------------------|-------|------------------|-----------------------------|-----------------------------|
| I(a.1) Precursor cell leukemias                            | 13478 | 0.871            | high                        | >50                         |
| I(a.2) Mature B-cell leukemias                             | 261   | 0.864            | high                        | >50                         |
| I(a.3) Mature T-cell and NK cell leukemias                 | 28    | 0.637            | low                         | >50                         |
| I(a.4) Lymphoid leukemia, NOS                              | 23    | 0.818            | medium                      | >50                         |
| I(b) Acute myeloid leukemias                               | 3089  | 0.628            | low                         | >50                         |
| I(c) Chronic myeloproliferative diseases                   | 471   | 0.869            | high                        | >50                         |
| I(d) Myelodysplastic syndrome and other myeloproliferative | 139   | 0.608            | low                         | >50                         |
| I(e) Unspecified and other specified leukemias             | 497   | 0.698            | low                         | >50                         |
| II(a) Hodgkin lymphomas                                    | 4706  | 0.964            | high                        | >50                         |
| II(b.1) Precursor cell lymphomas                           | 1106  | 0.832            | medium                      | >50                         |
| II(b.2) Mature B-cell lymphomas except Burkitt lymphoma    | 1396  | 0.882            | high                        | >50                         |
| II(b.3) Mature T-cell and NK-cell lymphomas                | 888   | 0.851            | high                        | >50                         |
| II(b.4) Non-Hodgkin lymphomas, NOS                         | 187   | 0.856            | high                        | >50                         |
| II(c) Burkitt lymphoma                                     | 978   | 0.902            | high                        | >50                         |
| II(d) Miscellaneous lymphoreticular neoplasms              | 227   | 0.878            | high                        | >50                         |
| II(e) Unspecified lymphomas                                | 120   | 0.854            | high                        | >50                         |
| III(a.1) Ependymomas                                       | 927   | 0.776            | medium                      | >50                         |
| III(a.2) Choroid plexus tumor                              | 105   | 0.639            | low                         | >50                         |
| III(b) Astrocytomas                                        | 5781  | 0.824            | medium                      | >50                         |
| III(c.1) Medulloblastomas                                  | 1526  | 0.715            | medium                      | >50                         |
| III(c.2) PNET                                              | 564   | 0.567            | low                         | >50                         |
| III(c.3) Medulloepithelioma                                | 27    | 0.681            | low                         | >50                         |
| III(c.4) Atypical teratoid/rhabdoid tumor                  | 301   | 0.328            | low                         | ≤50                         |
| III(d.1) Oligodendrogliomas                                | 276   | 0.86             | high                        | >50                         |
| III(d.2) Mixed and unspecified gliomas                     | 1642  | 0.548            | low                         | >50                         |
| III(d.3) Neuroepithelial glial tumors of uncertain orig    | 35    | 0.571            | low                         | >50                         |
| III(e.1) Pituitary adenomas and carcinomas                 | 3     | 1                | high                        | >50                         |
| III(e.3) Pineal parenchymal tumors                         | 144   | 0.618            | low                         | >50                         |
| III(e.4) Neuronal and mixed neuronal-glia tumors           | 46    | 0.884            | high                        | >50                         |
| III(e.5) Meningiomas                                       | 18    | 0.722            | medium                      | >50                         |
| III(f) Unspecified intracranial and intraspinal neoplasms  | 108   | 0.482            | low                         | ≤50                         |
| IV(a) Neuroblastoma and ganglioneuroblastoma               | 3036  | 0.772            | medium                      | >50                         |

|                                                          |      |       |        |     |
|----------------------------------------------------------|------|-------|--------|-----|
| IV(b) Other peripheral nervous cell tumors               | 87   | 0.81  | medium | >50 |
| IX(a) Rhabdomyosarcomas                                  | 1843 | 0.649 | low    | >50 |
| IX(b.1) Fibroblastic and myofibroblastic tumors          | 269  | 0.912 | high   | >50 |
| IX(b.2) Nerve sheath tumors                              | 216  | 0.609 | low    | >50 |
| IX(c) Kaposi sarcoma                                     | 14   | 0.787 | medium | >50 |
| IX(d.1) Ewing tumor and Askin tumor of soft tissue       | 263  | 0.718 | medium | >50 |
| IX(d.10) Alveolar soft parts sarcoma                     | 63   | 0.823 | medium | >50 |
| IX(d.11) Miscellaneous soft tissue sarcomas              | 151  | 0.354 | low    | ≤50 |
| IX(d.2) pPNET of soft tissue                             | 146  | 0.729 | medium | >50 |
| IX(d.3) Extrarenal rhabdoid tumor                        | 99   | 0.323 | low    | ≤50 |
| IX(d.4) Liposarcomas                                     | 132  | 0.881 | high   | >50 |
| IX(d.5) Fibrohistiocytic tumors                          | 476  | 0.995 | high   | >50 |
| IX(d.6) Leiomyosarcomas                                  | 82   | 0.867 | high   | >50 |
| IX(d.7) Synovial sarcomas                                | 411  | 0.83  | medium | >50 |
| IX(d.8) Blood vessel tumors                              | 60   | 0.568 | low    | >50 |
| IX(d.9) Osseous & chondromatous neoplasms of soft tissue | 38   | 0.624 | low    | >50 |
| IX(e) Unspecified soft tissue sarcomas                   | 454  | 0.725 | medium | >50 |
| V Retinoblastoma                                         | 1301 | 0.969 | high   | >50 |
| VI(a.1) Nephroblastoma                                   | 2204 | 0.92  | high   | >50 |
| VI(a.2) Rhabdoid renal tumor                             | 57   | 0.462 | low    | ≤50 |
| VI(a.3) Kidney sarcomas                                  | 80   | 0.908 | high   | >50 |
| VI(b) Renal carcinomas                                   | 209  | 0.76  | medium | >50 |
| VI(c) Unspecified malignant renal tumors                 | 6    | 0.751 | medium | >50 |
| VII(a) Hepatoblastoma                                    | 712  | 0.787 | medium | >50 |
| VII(b) Hepatic carcinomas                                | 226  | 0.446 | low    | ≤50 |
| VII(c) Unspecified malignant hepatic tumors              | 2    | 1     | high   | >50 |
| VIII(a) Osteosarcomas                                    | 1981 | 0.67  | low    | >50 |
| VIII(b) Chondrosarcomas                                  | 139  | 0.946 | high   | >50 |
| VIII(c.1) Ewing tumor and Askin tumor of bone            | 1064 | 0.688 | low    | >50 |
| VIII(c.2) pPNET of bone                                  | 59   | 0.773 | medium | >50 |
| VIII(d.1) Malignant fibrous neoplasms of bone            | 21   | 0.897 | high   | >50 |
| VIII(d.2) Malignant chordomas                            | 88   | 0.711 | medium | >50 |
| VIII(d.3) Odontogenic malignant tumors                   | 16   | 1     | high   | >50 |
| VIII(d.4) Miscellaneous malignant bone tumors            | 52   | 0.98  | high   | >50 |
| VIII(e) Unspecified malignant bone tumors                | 64   | 0.804 | medium | >50 |
| X(a.1) Intracranial & intraspinal germinomas             | 554  | 0.93  | high   | >50 |
| X(a.2) Intracranial & intraspinal teratomas              | 60   | 0.662 | low    | >50 |

|                                                         |      |       |        |     |
|---------------------------------------------------------|------|-------|--------|-----|
| X(a.3) Intracranial & intraspinal embryonal carcinomas  | 9    | 0.198 | low    | ≤50 |
| X(a.4) Intracranial & intraspinal yolk sac tumor        | 9    | 0.648 | low    | >50 |
| X(a.5) Intracranial & intraspinal choriocarcinoma       | 13   | 0.495 | low    | ≤50 |
| X(a.6) Intracranial & intraspinal tumors of mixed forms | 94   | 0.815 | medium | >50 |
| X(b.1) Germinomas: extracranial/extragonadal            | 65   | 0.771 | medium | >50 |
| X(b.2) Malignant teratomas: extracranial/extragonadal   | 232  | 0.83  | medium | >50 |
| X(b.3) Embryonal carcinomas: extracranial/extragonadal  | 9    | 0.535 | low    | >50 |
| X(b.4) Yolk sac tumor: extracranial/extragonadal        | 127  | 0.8   | medium | >50 |
| X(b.5) Choriocarcinomas: extracranial/extragonadal      | 76   | 0.919 | high   | >50 |
| X(b.6) Other mixed germ cell: extracranial/extragonadal | 94   | 0.726 | medium | >50 |
| X(c.1) Malignant gonadal germinomas                     | 587  | 0.971 | high   | >50 |
| X(c.2) Malignant gonadal teratomas                      | 591  | 0.977 | high   | >50 |
| X(c.3) Gonadal embryonal carcinomas                     | 301  | 0.988 | high   | >50 |
| X(c.4) Gonadal yolk sac tumor                           | 316  | 0.953 | high   | >50 |
| X(c.5) Gonadal choriocarcinoma                          | 34   | 0.663 | low    | >50 |
| X(c.6) Malignant gonadal tumors of mixed forms          | 1260 | 0.944 | high   | >50 |
| X(d) Gonadal carcinomas                                 | 167  | 0.765 | medium | >50 |
| X(e) Other and unspecified malignant gonadal tumors     | 92   | 0.927 | high   | >50 |
| XI(a) Adrenocortical carcinomas                         | 89   | 0.552 | low    | >50 |
| XI(b) Thyroid carcinomas                                | 3141 | 0.993 | high   | >50 |
| XI(c) Nasopharyngeal carcinomas                         | 210  | 0.869 | high   | >50 |
| XI(d) Malignant melanomas                               | 1865 | 0.95  | high   | >50 |
| XI(e) Skin carcinomas                                   | 31   | 1     | high   | >50 |
| XI(f.1) Carcinomas of salivary glands                   | 308  | 0.963 | high   | >50 |
| XI(f.10) Carcinomas of other specified sites            | 416  | 0.757 | medium | >50 |
| XI(f.11) Carcinomas of unspecified site                 | 53   | 0.346 | low    | ≤50 |
| XI(f.2) Carcinomas of colon and rectum                  | 225  | 0.539 | low    | >50 |
| XI(f.3) Carcinomas of appendix                          | 416  | 0.981 | high   | >50 |
| XI(f.4) Carcinomas of lung                              | 162  | 0.82  | medium | >50 |
| XI(f.5) Carcinomas of thymus                            | 22   | 0.621 | low    | >50 |
| XI(f.6) Carcinomas of breast                            | 66   | 0.837 | medium | >50 |
| XI(f.7) Carcinomas of cervix uteri                      | 48   | 0.835 | medium | >50 |
| XI(f.8) Carcinomas of bladder                           | 93   | 0.957 | high   | >50 |
| XI(f.9) Carcinomas of eye                               | 8    | 1     | high   | >50 |

Abbreviations: NK, natural killer; NOS, not otherwise specified; PNET, primitive neuroectodermal tumor; pPNET, peripheral primitive neuroectodermal tumor; RSR, relative survival rate.

<sup>a</sup>Cancer types based on International Classification of Childhood Cancer extended classification definitions.<sup>1</sup> Cancer types with zero cases were removed.

<sup>b</sup>Five-year relative survival rates were calculated for each cancer type among cases aged 0-19 years with a first primary malignant cancer diagnosed from 2000-2016 using SEER 18 data and SEER\*Stat software.<sup>2</sup>

<sup>c</sup>The RSR 3-category variable was based on RSR cut points of >85% (high amenability), 70-85% (medium amenability), and <70% (low amenability). The RSR 2-category variable was based on relative survival rate cut points of >50% and ≤50%



**eTable 3. Risk of cancer death for children and adolescents diagnosed with cancer from 2007-2016 by race/ethnicity and cancer amenability category (Low: <70% RSR, Medium: 70-85% RSR, High: >85% RSR) with non-Hispanic Whites as the reference group and adjusting for insurance status.**

| Race/Ethnicity                       | Total No. | Dead No.    | HR (95% CI) <sup>a</sup> | HR (95% CI) <sup>b</sup> |
|--------------------------------------|-----------|-------------|--------------------------|--------------------------|
| NH White                             | 19 727    | 2180 (11.1) | Ref                      | Ref                      |
| NH Black                             | 4167      | 708 (17.0)  | 1.58 (1.45-1.72)         | 1.37 (1.26-1.50)         |
| NH American Indian/Alaskan Native    | 327       | 55 (16.8)   | 1.62 (1.24-2.11)         | 1.46 (1.11-1.91)         |
| NH Asian or Pacific Islander         | 3134      | 432 (13.8)  | 1.36 (1.22-1.50)         | 1.39 (1.25-1.54)         |
| Hispanic (any race)                  | 12 006    | 1610 (13.4) | 1.31 (1.23-1.40)         | 1.28 (1.19-1.37)         |
| <b>Race/Ethnicity by Amenability</b> |           |             |                          |                          |
| NH White                             |           |             |                          |                          |
| Low                                  | 3560      | 971 (27.3)  | Ref                      | Ref                      |
| Medium                               | 5253      | 747 (14.2)  | Ref                      | Ref                      |
| High                                 | 10 914    | 462 (4.2)   | Ref                      | Ref                      |
| NH Black                             |           |             |                          |                          |
| Low                                  | 964       | 311 (32.3)  | 1.24 (1.10-1.41)         | 1.16 (1.02-1.32)         |
| Medium                               | 1145      | 244 (21.3)  | 1.62 (1.41-1.88)         | 1.53 (1.32-1.77)         |
| High                                 | 2058      | 153 (7.4)   | 1.76 (1.46-2.11)         | 1.65 (1.37-1.98)         |
| P for interaction                    |           |             | 0.003                    | 0.002                    |
| NH American Indian/Alaskan Native    |           |             |                          |                          |
| Low                                  | 70        | 26 (37.1)   | 1.34 (0.91-1.97)         | 1.25 (0.85-1.86)         |
| Medium                               | 80        | 19 (23.8)   | 2.04 (1.30-3.22)         | 1.96 (1.24-3.10)         |
| High                                 | 177       | 10 (5.6)    | 1.39 (0.74-2.59)         | 1.33 (0.71-2.48)         |
| P for interaction                    |           |             | 0.35                     | 0.32                     |
| NH Asian or Pacific Islander         |           |             |                          |                          |
| Low                                  | 622       | 197 (31.7)  | 1.35 (1.16-1.57)         | 1.35 (1.15-1.57)         |
| Medium                               | 748       | 142 (19.0)  | 1.49 (1.24-1.78)         | 1.49 (1.24-1.78)         |
| High                                 | 1764      | 93 (5.3)    | 1.33 (1.06-1.66)         | 1.33 (1.07-1.67)         |
| P for interaction                    |           |             | 0.65                     | 0.65                     |
| Hispanic (any race)                  |           |             |                          |                          |
| Low                                  | 2195      | 690 (31.4)  | 1.28 (1.16-1.41)         | 1.17 (1.06-1.30)         |
| Medium                               | 2489      | 419 (16.8)  | 1.30 (1.16-1.47)         | 1.19 (1.06-1.35)         |
| High                                 | 7322      | 501 (6.8)   | 1.74 (1.53-1.97)         | 1.58 (1.39-1.80)         |
| P for interaction                    |           |             | <0.001                   | <0.001                   |

Abbreviations: NH, non-Hispanic; N, number; HR, hazard ratio; CI, confidence interval.

<sup>a</sup>Unadjusted model using age as the time scale. The race/ethnicity by amenability models also include amenability category and an interaction term between race and amenability category.

<sup>b</sup>Adjusted model using age as the time scale. Model includes insurance category, percent below high school education in county quintile, and median family income in county quintile. The race/ethnicity by amenability models also include amenability category and an interaction term between race and amenability category.

**eTable 4. Risk of cancer death for children and adolescents diagnosed with cancer from 2000-2016 by race/ethnicity and cancer amenability category ( $\leq 50\%$  and  $>50\%$  RSR) with non-Hispanic White as the reference group and adjusting for insurance status.**

| Race/Ethnicity                    | Total No. | Dead No. (%) | HR (95% CI) <sup>a</sup> | HR (95% CI) <sup>b</sup> |
|-----------------------------------|-----------|--------------|--------------------------|--------------------------|
| NH White                          |           |              |                          |                          |
| $\leq 50\%$                       | 293       | 139 (47.4)   | Ref                      | Ref                      |
| $>50\%$                           | 19 434    | 2041 (10.5)  | Ref                      | Ref                      |
| NH Black                          |           |              |                          |                          |
| $\leq 50\%$                       | 88        | 43 (48.9)    | 1.09 (0.77-1.53)         | 1.08 (0.76-1.52)         |
| $>50\%$                           | 4079      | 665 (16.3)   | 1.60 (1.46-1.74)         | 1.49 (1.36-1.63)         |
| P for interaction                 |           |              | 0.03                     | 0.07                     |
| NH American Indian/Alaskan Native |           |              |                          |                          |
| $\leq 50\%$                       | 4         | 1 (25.0)     | 0.30 (0.04-2.15)         | 0.29 (0.04-2.04)         |
| $>50\%$                           | 323       | 54 (16.7)    | 1.71 (1.31-2.24)         | 1.62 (1.23-2.12)         |
| P for interaction                 |           |              | 0.09                     | 0.09                     |
| NH Asian or Pacific Islander      |           |              |                          |                          |
| $\leq 50\%$                       | 58        | 32 (55.2)    | 1.19 (0.81-1.74)         | 1.24 (0.85-1.83)         |
| $>50\%$                           | 3076      | 400 (13.0)   | 1.35 (1.21-1.50)         | 1.36 (1.22-1.51)         |
| P for interaction                 |           |              | 0.52                     | 0.67                     |
| Hispanic (any race)               |           |              |                          |                          |
| $\leq 50\%$                       | 183       | 94 (51.4)    | 1.32 (1.01-1.71)         | 1.23 (0.94-1.60)         |
| $>50\%$                           | 11 823    | 1516 (12.8)  | 1.32 (1.23-1.41)         | 1.20 (1.12-1.29)         |
| P for interaction                 |           |              | 0.99                     | 0.87                     |

Abbreviations: NH, non-Hispanic; No., number; HR, hazard ratio; CI, confidence interval; Ref, reference.

<sup>a</sup>Unadjusted model using age as the time scale. The race/ethnicity by amenability models also include amenability category and an interaction term between race and amenability category.

<sup>b</sup>Adjusted model using age as the time scale. Model included percent below high school education in county quintile and median family income in county quintile, amenability category and an interaction term between race and amenability category.

**eTable 5. Risk of cancer death for children and adolescents diagnosed with cancer from 2000-2016 by race/ethnicity for common cancer types.**

| Cancer type/Race                                               | Total No. (%) | Dead No. (%) | HR <sup>a</sup> | 95% CI     | HR <sup>b</sup> | 95% CI     |
|----------------------------------------------------------------|---------------|--------------|-----------------|------------|-----------------|------------|
| <b>Rhabdomyosarcoma (5-year RSR=65%)</b>                       |               |              |                 |            |                 |            |
| NH White                                                       | 911           | 265          | 1.0             | Ref        | 1.0             | Ref        |
| NH Black                                                       | 291           | 95           | 1.2             | 0.95-1.52  | 1.22            | 0.96-1.55  |
| NH American Indian/Alaskan Native                              | 18            | 9            | 2.4             | 1.23-4.67  | 2.38            | 1.21-4.68  |
| NH Asian or Pacific Islander                                   | 124           | 43           | 1.54            | 1.12-2.13  | 1.57            | 1.13-2.18  |
| Hispanic                                                       | 499           | 160          | 1.24            | 1.02-1.51  | 1.21            | 0.98-1.49  |
| <b>Precursor cell leukemia (5-year RSR=87%)</b>                |               |              |                 |            |                 |            |
| NH White                                                       | 6148          | 547          | 1.0             | Ref        | 1.0             | Ref        |
| NH Black                                                       | 914           | 136          | 1.73            | 1.43-2.09  | 1.69            | 1.40-2.05  |
| NH American Indian/Alaskan Native                              | 130           | 19           | 1.7             | 1.08-2.69  | 1.71            | 1.08-2.71  |
| NH Asian or Pacific Islander                                   | 1041          | 118          | 1.41            | 1.16-1.72  | 1.44            | 1.18-1.76  |
| Hispanic                                                       | 5245          | 758          | 1.88            | 1.69-2.10  | 1.74            | 1.55-1.96  |
| <b>Hodgkin Lymphoma (5-year RSR=96%)</b>                       |               |              |                 |            |                 |            |
| NH White                                                       | 2726          | 97           | 1.0             | Ref        | 1.0             | Ref        |
| NH Black                                                       | 576           | 34           | 1.85            | 1.25-2.73  | 1.74            | 1.17-2.60  |
| NH American Indian/Alaskan Native                              | 18            | 1            | 1.47            | 0.21-10.57 | 1.44            | 0.20-10.48 |
| NH Asian                                                       | 288           | 16           | 1.8             | 1.06-3.06  | 1.93            | 1.13-3.29  |
| Hispanic                                                       | 1098          | 41           | 1.18            | 0.81-1.70  | 1.14            | 0.78-1.68  |
| <b>Astrocytoma (5-year RSR=82%)</b>                            |               |              |                 |            |                 |            |
| NH White                                                       | 3516          | 494          | 1.0             | Ref        | 1.0             | Ref        |
| NH Black                                                       | 621           | 138          | 1.81            | 1.50-2.19  | 1.78            | 1.47-2.16  |
| NH American Indian/Alaskan Native                              | 42            | 6            | 1.17            | 0.52-2.61  | 1.18            | 0.52-2.64  |
| NH Asian or Pacific Islander                                   | 331           | 73           | 1.81            | 1.41-2.31  | 1.91            | 1.49-2.45  |
| Hispanic                                                       | 1271          | 233          | 1.42            | 1.21-1.65  | 1.39            | 1.18-1.64  |
| <b>Acute Myeloid Leukemia (5-year RSR=63%)</b>                 |               |              |                 |            |                 |            |
| NH White                                                       | 1406          | 407          | 1.0             | Ref        | 1.0             | Ref        |
| NH Black                                                       | 391           | 160          | 1.7             | 1.41-2.04  | 1.68            | 1.40-2.03  |
| NH American Indian/Alaskan Native                              | 43            | 13           | 0.91            | 0.52-1.58  | 0.87            | 0.50-1.52  |
| NH Asian or Pacific Islander                                   | 299           | 93           | 1.24            | 0.99-1.55  | 1.31            | 1.04-1.65  |
| Hispanic                                                       | 950           | 301          | 1.25            | 1.07-1.45  | 1.19            | 1.01-1.40  |
| <b>Neuroblastoma and Ganglioneuroblastoma (5-year RSR=77%)</b> |               |              |                 |            |                 |            |
| NH White                                                       | 1769          | 318          | 1.0             | Ref        | 1.0             | Ref        |
| NH Black                                                       | 382           | 93           | 1.52            | 1.21-1.92  | 1.50            | 1.19-1.89  |

|                                         |      |     |      |           |      |           |
|-----------------------------------------|------|-----|------|-----------|------|-----------|
| NH American Indian/Alaskan Native       | 17   | 5   | 1.75 | 0.72-4.24 | 1.86 | 0.76-4.55 |
| NH Asian or Pacific Islander            | 222  | 56  | 1.92 | 1.44-2.55 | 1.97 | 1.47-2.63 |
| Hispanic                                | 646  | 134 | 1.32 | 1.08-1.61 | 1.23 | 1.00-1.53 |
| <b>Nephroblastoma (5-year RSR=92%)</b>  |      |     |      |           |      |           |
| NH White                                | 1108 | 69  | 1.0  | Ref       | 1.0  | Ref       |
| NH Black                                | 379  | 25  | 1.13 | 0.71-1.79 | 1.10 | 0.69-1.74 |
| NH American Indian/Alaskan Native       | 24   | 1   | 0.69 | 0.10-4.97 | 0.74 | 0.10-5.36 |
| NH Asian or Pacific Islander            | 101  | 9   | 1.57 | 0.78-3.14 | 1.46 | 0.72-2.94 |
| Hispanic                                | 592  | 51  | 1.55 | 1.08-2.23 | 1.35 | 0.91-1.99 |
| <b>Osteosarcoma (5-year RSR=67%)</b>    |      |     |      |           |      |           |
| NH White                                | 895  | 267 | 1.0  | Ref       | 1.0  | Ref       |
| NH Black                                | 318  | 96  | 1.03 | 0.82-1.31 | 1.03 | 0.81-1.30 |
| NH American Indian/Alaskan Native       | 14   | 8   | 2.55 | 1.26-5.15 | 2.77 | 1.36-5.67 |
| NH Asian or Pacific Islander            | 152  | 37  | 0.85 | 0.60-1.20 | 0.84 | 0.59-1.19 |
| Hispanic                                | 602  | 185 | 1.09 | 0.91-1.32 | 1.06 | 0.87-1.29 |
| <b>Medulloblastoma (5-year RSR=72%)</b> |      |     |      |           |      |           |
| NH White                                | 877  | 231 | 1.0  | Ref       | 1.0  | Ref       |
| NH Black                                | 119  | 39  | 1.46 | 1.04-2.05 | 1.43 | 1.01-2.01 |
| NH American Indian/Alaskan Native       | 13   | 3   | 1.33 | 0.42-4.15 | 1.33 | 0.42-4.20 |
| NH Asian or Pacific Islander            | 115  | 33  | 1.17 | 0.81-1.68 | 1.10 | 0.76-1.60 |
| Hispanic                                | 402  | 117 | 1.06 | 0.85-1.32 | 1.01 | 0.80-1.28 |

Abbreviations: NH, non-Hispanic; No., number; HR, hazard ratio; CI, confidence interval; Ref, reference.

<sup>a</sup>Unadjusted model using age as the time scale.

<sup>b</sup>Adjusted model using age as the time scale. Model adjusted for percent below high school education in county quintile and median family income in county quintile.

## eReferences

1. Steliarova-Foucher, E, Stiller, C, Lacour, B, *et al.* International classification of childhood cancer, third edition. *Cancer* **103**, 1457–1467 (2005).
2. Surveillance Research Program. National Cancer Institute SEER\*Stat software ([seer.cancer.gov/seerstat](http://seer.cancer.gov/seerstat)) version 8.3.5.
